# Supplementary material for: The Baby Moves prospective cohort study protocol: using a smartphone application with the General Movements Assessment to predict neurodevelopmental outcomes at age 2 years for extremely preterm or extremely low birthweight infants
Source: PubMed Central journal article supplement — BMJ Open. 2016 Oct 3;6(10):e013446. doi: 10.1136/bmjopen-2016-013446 (PMC5073614; doi:10.1136/bmjopen-2016-013446), 2016-10-03
Supplement: bmjopen-2016-013446supp1.pdf [file bmjopen-2016-013446supp1.pdf]

# Family Information

Thank you for taking the time to answer these questions. Please circle the answer below that best answers the question for you. While we would like you to answer all questions, we appreciate that you may not want to answer all items.

## 1. What is your relationship to the child participating in this study?

- Biological mother ..... **1**  
 Biological father ..... **2**  
 Step mother ..... **3**  
 Step father ..... **4**  
 Foster parent ..... **5**  
 Family relation (e.g., aunt, grandmother) .... **6**  
 Other, please specify: ..... **7**

## 2. a) Are you the primary caregiver?

Yes ☐ No ☐

## b) If no, who is the primary caregiver?

- Biological mother ..... **1**  
 Biological father ..... **2**  
 Step mother ..... **3**  
 Step father ..... **4**  
 Foster parent ..... **5**  
 Family relation (e.g., aunt, grandmother) .... **6**  
 Other, please specify: ..... **7**

## 3. What is the child's family living situation?

- Child living with mother and father ..... **1**  
 Child living with mother only ..... **2**  
 Child living with father only ..... **3**  
 Parents separated/divorced but both have custody rights ..... **4**  
 Other, please specify: ..... **5**

## 4. How many brothers and sisters does the child have?

Biological..... Non-biological.....

## 5. How many other children live at home?

## 6. How many adults (older than 21 years) live at home?

## 7. What ethnic groups do you belong to or identify with?

1. ....  
 2. ....  
 3. ....

## 8. Which of the following best describes your highest level of education?

- Left school between 13-16 years ..... **1**  
 Completed Year 11 ..... **2**  
 High School Certificate (completed Yr 12).... **3**  
 University degree ..... **4**  
 University post-graduate degree ..... **5**

## 9. Do you have other qualifications? (e.g., trade, secretarial)

Yes ☐ No ☐

## If yes, please specify:

## 10. Were you working prior to maternity leave?

- Yes, full time ..... **1**  
 Yes, part time (<30 hours) ..... **2**  
 No ..... **3**

## If yes, please provide a title and description of the job.

## 11. Are you currently living with a partner?

- Yes, legally married ..... **1**  
 Yes, defacto relationship ..... **2**  
 No ..... **3**

*If you answered 'No', please go to question 16.*

**12. What ethnic groups does your partner/spouse belong to or identify with?**

1. ....
2. ....
3. ....

**13. Which of the following best describes your partner/spouse's highest level of education?**

- Left school between 13-16 years ..... **1**  
 Completed Year 11 ..... **2**  
 High School Certificate (completed Yr 12) .... **3**  
 University degree ..... **4**  
 University post-graduate degree..... **5**

**14. Does your partner/spouse have other qualifications? (e.g., trade, secretarial)**

Yes ☐ No ☐

**If yes, please specify:**

**15. Is your partner/spouse working at the moment?**

- Yes, full time ..... **1**  
 Yes, part time (<30 hours) ..... **2**  
 No ..... **3**

**If yes, please provide a title and description of the job.**

**16. Which language is spoken at home?**

- Only language spoken at home is English .... **1**  
 English is one of the languages spoken ..... **2**  
 Little or no English is spoken at home ..... **3**

Please indicate which languages other than English are spoken at home.
