# Supplementary material for: The Baby Moves prospective cohort study protocol: using a smartphone application with the General Movements Assessment to predict neurodevelopmental outcomes at age 2 years for extremely preterm or extremely low birthweight infants
Source: PubMed Central journal article supplement — BMJ Open. 2016 Oct 3;6(10):e013446. doi: 10.1136/bmjopen-2016-013446 (PMC5073614; doi:10.1136/bmjopen-2016-013446), 2016-10-03
Supplement: bmjopen-2016-013446supp2.pdf [file bmjopen-2016-013446supp2.pdf]

## **BABY MOVES APP SURVEY**

Thank you for completing this survey and providing feedback about using the Baby Moves smartphone app. There are 12 questions in this survey and it should take about 2-5 minutes to complete. Please tick one box for each question. There is also space after each question to leave comments. If you have any questions about this survey, please do not hesitate to contact Amanda Kwong via email at [vics.infantstudy@thewomens.org.au](mailto:vics.infantstudy@thewomens.org.au) or by phone on (03) 8345 3710 or 8345 3709.

### **1. What type of mobile phone do you have?**

- iPhone (iOS/Apple)
- Android

### **2. Overall, the Baby Moves app was easy to use.**

- Strongly disagree
- Disagree
- Neither agree nor disagree
- Agree
- Strongly agree

Additional comments:

### **3. The reminders about when to record the videos were helpful.**

- Strongly disagree
- Disagree
- Neither agree nor disagree
- Agree
- Strongly agree

Additional comments:

### **4. The number of reminders about when to record the videos was appropriate.**

- Strongly disagree
- Disagree
- Neither agree nor disagree
- Agree
- Strongly agree

Additional comments:

### **5. The instructions for videoing were easy to follow.**

- Strongly disagree
- Disagree
- Neither agree nor disagree
- Agree
- Strongly agree

Additional comments:

**6. The outline shape made it easy to understand where to position my baby for videoing.**

- Strongly disagree
- Disagree
- Neither agree nor disagree
- Agree
- Strongly agree

Additional comments:

**7. There were no issues with uploading the video.**

- Strongly disagree
- Disagree
- Neither agree nor disagree
- Agree
- Strongly agree

Additional comments:

**8. I would prefer a face-to-face health professional visit to video and view my baby rather than sending videos via the Baby Moves app**

- Strongly disagree
- Disagree
- Neither agree nor disagree
- Agree
- Strongly agree

Additional comments:

**9. I felt worried about my baby's development by using the Baby Moves app.**

- Strongly disagree

- Disagree
- Neither agree nor disagree
- Agree
- Strongly agree

Additional comments:

**10. The Baby Moves app increased my awareness of my child's development**

- Strongly disagree
- Disagree
- Neither agree nor disagree
- Agree
- Strongly agree

Additional comments:

**11. The Baby Moves app provided a safe and secure way of sending video footage to a healthcare professional.**

- Strongly disagree
- Disagree
- Neither agree nor disagree
- Agree
- Strongly agree

Additional comments:

**12. I was able to access further information about the Baby Moves app**

- Strongly disagree
- Disagree
- Neither agree nor disagree
- Agree
- Strongly agree
- I did not seek further information about the Baby Moves app

Additional comments:
